# Supplementary material for: Novel insights into host-pathogen interactions of large yellow croakers (Larimichthys crocea) and pathogenic bacterium Pseudomonas plecoglossicida using time-resolved dual RNA-seq of infected spleens
Source: PubMed Central journal article supplement — Zool Res. 2020 May 18;41(3):314–27. doi: 10.24272/j.issn.2095-8137.2020.035 (PMC7231473; doi:10.24272/j.issn.2095-8137.2020.035), 2020-05-18
Supplement: zr-41-3-314-S1.pdf [file zr-41-3-314-S1.pdf]

## Supplementary Figures

**A**

Clusters ordered based on number of genes and profiles ordered by significance (default)

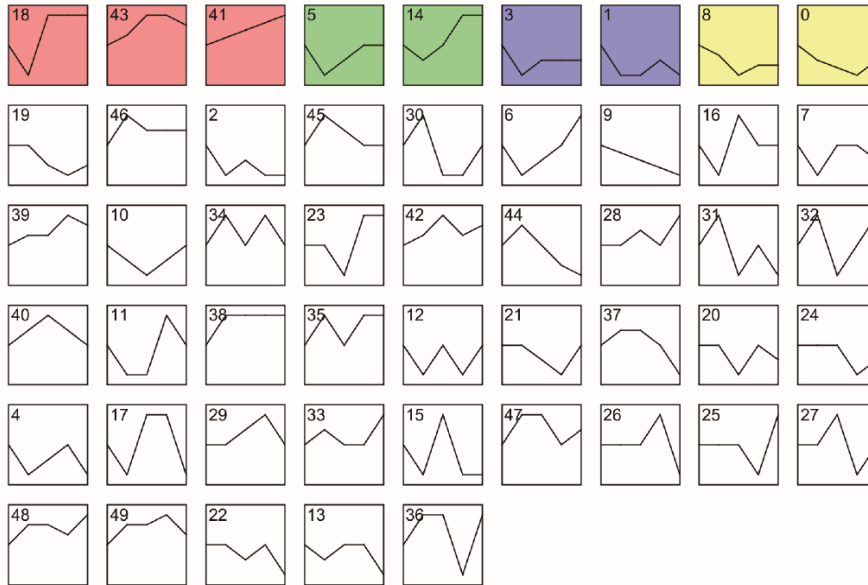

**B**

Clusters ordered based on number of genes and profiles ordered by significance (default)

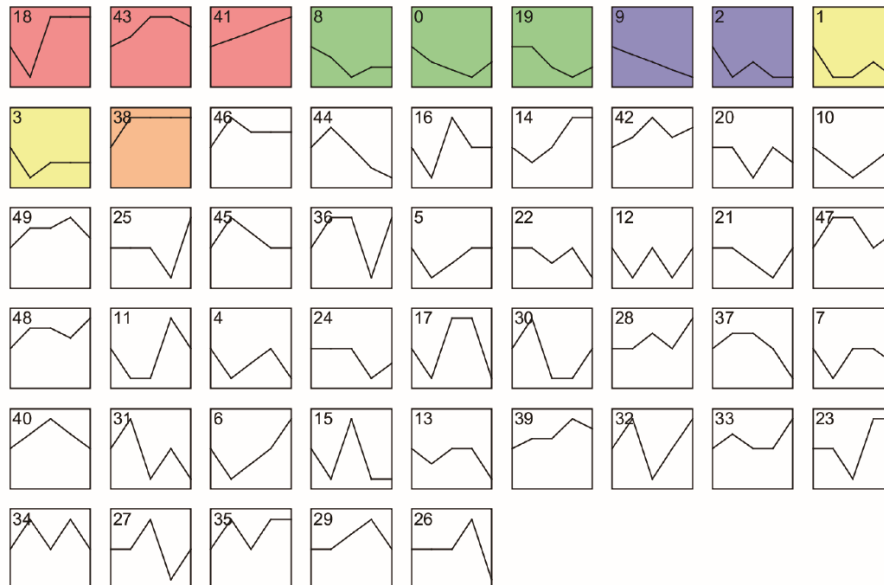

## Supplementary Figure S1 STEM analysis result

(A) *Larimichthys crocea*; (B) *Pseudomonas plecoglossicida*.

**A**

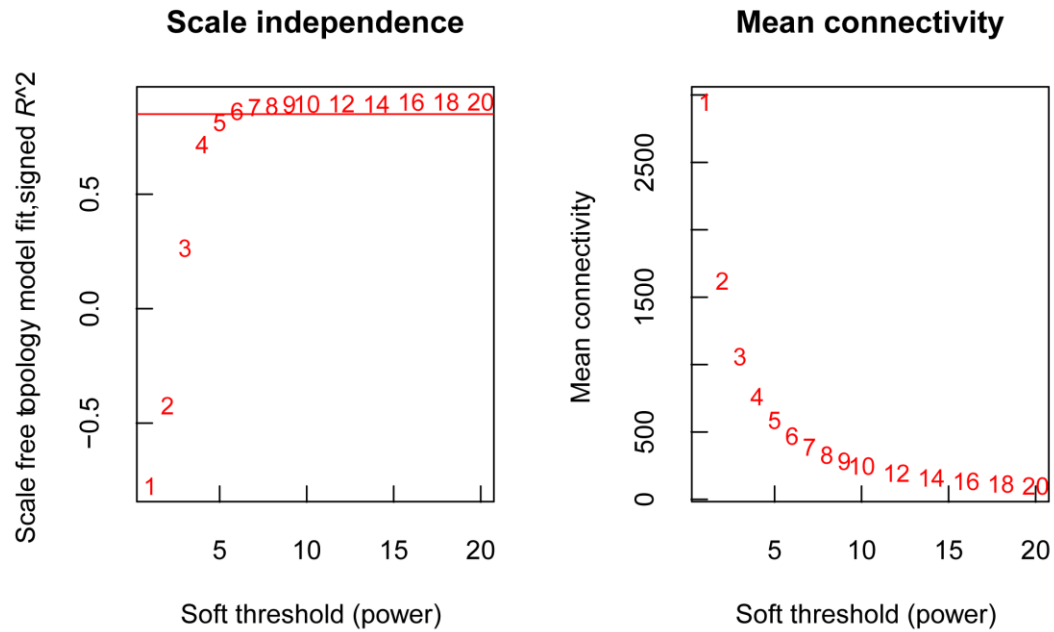

**B**

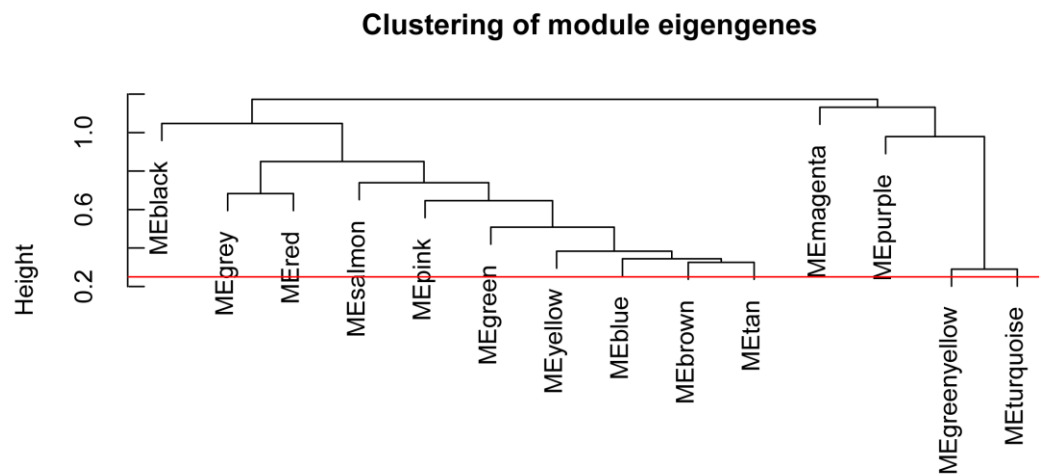

**Supplementary Figure S2** Result of weighted gene correlation network analysis (WGCNA) analysis

(A) Determination of parameter  $\beta$  of the adjacency function in the weighted gene correlation network analysis (WGCNA) algorithm. (B) Relatedness between clusters generated by WGCNA analysis.

**Supplementary Tables**  
**Supplementary Table S1 Sequencing statics**

| <b>Sample_ID</b>                   | <b>Mapped reads/Total reads</b> | <b>Mapping rate</b> |
|------------------------------------|---------------------------------|---------------------|
| <i>Larimichthys crocea</i>         |                                 |                     |
| mock_PI_1                          | 60560526/68374542               | 88.57%              |
| mock_PI_2                          | 53536892/60620642               | 88.31%              |
| mock_PI_3                          | 65093420/73839154               | 88.16%              |
| WT_1d_1                            | 170471769/190128514             | 89.66%              |
| WT_1d_2                            | 177957855/198458648             | 89.67%              |
| WT_1d_3                            | 203336580/227370882             | 89.43%              |
| WT_2d_1                            | 179300790/200048168             | 89.63%              |
| WT_2d_2                            | 169575247/190546784             | 88.99%              |
| WT_2d_3                            | 182875898/203641328             | 89.80%              |
| WT_3d_1                            | 181758753/206533094             | 88.00%              |
| WT_3d_2                            | 193505042/216481594             | 89.39%              |
| WT_3d_3                            | 175427210/199704300             | 87.84%              |
| WT_4d_1                            | 168505171/194250978             | 86.75%              |
| WT_4d_2                            | 154738080/207548980             | 74.55%              |
| WT_4d_3                            | 173441469/199386590             | 86.99%              |
| <i>Pseudomonas plecoglossicida</i> |                                 |                     |
| mock_cj_1                          | 20883456/21107326               | 98.94%              |
| mock_cj_2                          | 20925696/21157930               | 98.90%              |
| mock_cj_3                          | 20690483/20896468               | 99.01%              |
| WT_1d_1                            | 33156/190128514                 | 0.02%               |
| WT_1d_2                            | 32033/198458648                 | 0.02%               |
| WT_1d_3                            | 24392/227370882                 | 0.01%               |
| WT_2d_1                            | 378935/200048168                | 0.19%               |
| WT_2d_2                            | 164994/190546784                | 0.09%               |

|                |                    |        |
|----------------|--------------------|--------|
| <b>WT_2d_3</b> | 149782/203641328   | 0.07%  |
| <b>WT_3d_1</b> | 3524199/206533094  | 1.71%  |
| <b>WT_3d_2</b> | 282724/216481594   | 0.13%  |
| <b>WT_3d_3</b> | 2836803/199704300  | 1.42%  |
| <b>WT_4d_1</b> | 5042046/194250978  | 2.60%  |
| <b>WT_4d_2</b> | 31878030/207548980 | 15.36% |
| <b>WT_4d_3</b> | 3967360/199386590  | 1.99%  |

---

**Supplementary Table S2 Primers Sequence for PCR and qRT-PCR**

| <b>Gene Name</b>                       | <b>Base sequence (From 5' to 3')</b> |
|----------------------------------------|--------------------------------------|
| <i>gyrB</i>                            | F:5' TGCTGAAGGACGAGCGTTTCG 3'        |
|                                        | R:5' ATCATCTTGCCGACAACAGC 3'         |
| <i>16s</i>                             | F:5' TCAGTATCAGTCCAGGTGGTCGC 3'      |
|                                        | R:5' CGTTACCGACAGAATAAGCACCG 3'      |
| <i>pcM130</i>                          | F:5' CTCCTGGTTGGCTTGGTTTC 3'         |
|                                        | R:5' GGTGTTCCCTTCTTCACTGTCCCT 3'     |
| <i>actf (<math>\beta</math>-actin)</i> | F:5' GACCTGACAGACTACCTCATG 3'        |
|                                        | R:5' AGTTGAAGGTGGTCTCGTGGA 3'        |
| <i>LOC104920199</i>                    | F:5' TCCTTTGCGGGACTTCTGCT 3'         |
|                                        | R:5' TTGGTGGGAGTGGTGGCTGT 3'         |
| <i>LOC104932156</i>                    | F:5' CTGGAATGGGAGAATGGAAC 3'         |
|                                        | R:5' AACAGGAGCAGGGTAGAAAA 3'         |
| <i>LOC104922235</i>                    | F:5' GGAGAATGGAAATGGGTG 3'           |
|                                        | R:5' GGAGCAGGGAACATCGTA 3'           |
| <i>LOC104919239</i>                    | F:5' TGAGCAATAAAGTGACACCCAT 3'       |
|                                        | R:5' GGCAAGAGGCAGTACGAGGT 3'         |
| <i>LOC109139448</i>                    | F:5' CTACCAGCAGCAGACAAGAGC 3'        |
|                                        | R:5' GATGTGCCGGATACCGTGAG 3'         |
| <i>LOC104936237</i>                    | F:5' GGCTCTGCCCTCGCTGCTTT 3'         |
|                                        | R:5' TTCCTGTAGTCCCCTCTGTCTT 3'       |
| <i>hsp90b1</i>                         | F:5' GACTGGGAACTGATGAACGA 3'         |
|                                        | R:5' CCATAAAGTGGATGTGAGCC 3'         |
| <i>pak1ip1</i>                         | F:5' TCACAACGGAAGCATCACCT 3'         |
|                                        | R:5' GGATTTTCAGACACTCCCCT 3'         |
| <i>dyrk2</i>                           | F:5' ATTCTAGGCTCTAGGTATGGGATG 3'     |
|                                        | R:5' CAACTGGTCGGCTTCGTCTT 3'         |
| <i>LOC104938114</i>                    | F:5' CAGGGCATGAGGCGGGTAGT 3'         |
|                                        | R:5' CGGAGGGTGGTGCTGTTGAG 3'         |
| <i>LOC104932572</i>                    | F:5' TAAGACACGGAAGCCCAGTA 3'         |
|                                        | R:5' CATGTATTTCGAGCCAAACG 3'         |

|                       |                                 |
|-----------------------|---------------------------------|
| <i>LOC104939072</i>   | F:5' ACTGGGAGGTGGACTATGA 3'     |
|                       | R:5' CCTGGGTATTGACGCTGA 3'      |
| <i>fliG</i>           | F:5' TCACTCCGTCCAGTTGATGCC 3'   |
|                       | R:5' CCCTTGATGCTGCTTTGCTC 3'    |
| <i>flgD</i>           | F:5' GCGCCAGGCAAATACGACAT 3'    |
|                       | R:5' GATACGACTGAACGGCACCC 3'    |
| <i>L321_RS18300</i>   | F:5' AGCCCAGCAGCAAACCCTCA 3'    |
|                       | R:5' AATGCCGCCGAATGCGATGT 3'    |
| <i>L321_RS06430</i>   | F:5' TTGGAAGTGCTGACGCTGATC 3'   |
|                       | R:5' CGGCTGGAGTGGTAGTTGCT 3'    |
| <i>L321_RS04795</i>   | F:5' GCCTTCGCCGAGCAGGTGTT 3'    |
|                       | R:5' AGGTGTCGCCCTTGTGGTTGC 3'   |
| <i>L321_RS23835</i>   | F:5' CAACTGGTTCACGCCCAATGTC 3'  |
|                       | R:5' GCAACACGGGCAGGTTCTTTT 3'   |
| <i>L321_RS17435</i>   | F:5' TGAGTTCATCGACCGCTATGTG 3'  |
|                       | R:5' TCTCCAGGTTCTCGCTCCAGT 3'   |
| <i>L321_RS01350</i>   | F:5' CCGCATATCGCAGGTTACAGCC 3'  |
|                       | R:5' GGCGACATCCTCACTCAGGCTAC 3' |
| <i>F:L321_RS07175</i> | F:5' TCGGTGGCGCAGGATTGTTT 3'    |
|                       | R:5' CGGGCATTTCCTTGAGCACATC 3'  |
| <i>L321_RS15215</i>   | F:5' ACCAGGAAATGCTCGCTGACCC 3'  |
|                       | R:5' CAGCACCTGCGACCGATGT 3'     |
| <i>L321_RS06550</i>   | F:5' GCAAGGCACTCATCCAGACACTG 3' |
|                       | R:5' GGCACGCCCTGCTCTTCATAG 3'   |
| <i>L321_RS20240</i>   | F:5' CTGGCGGCTATTTCTGTGGC 3'    |
|                       | R:5' TGATCCGTCCGAGCGTTTCC 3'    |
| <i>L321_RS24165</i>   | F:5' CGTGGTGATCTTCGTGGTCG 3'    |
|                       | R:5' TTCAGCGTTCGGCAGTTGTT 3'    |
| <i>L321_RS10520</i>   | F:5' GCAAACGCATCGTTACCAC 3'     |
|                       | R:5' CGCCTGAGTAATCACGCTAAAT 3'  |

---
